# Supplementary material
Source: publisher site journal article supplement (https://www.dovepress.com/article/506893)
Supplement: Supplementary file 1 [file get_supplementary_file.php]

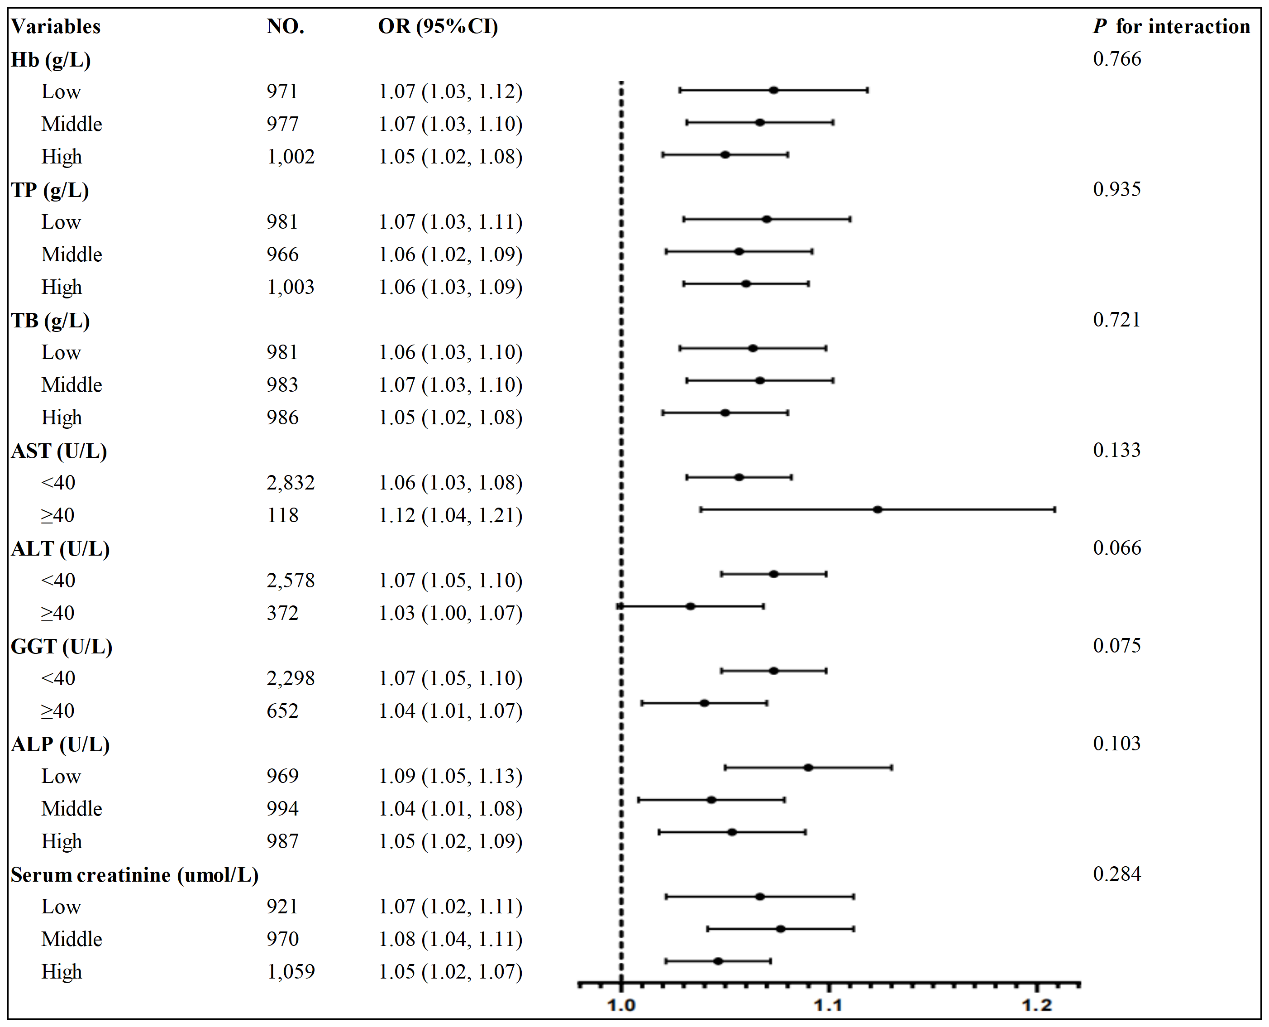


**Supplementary Figure. 1** The relationship between LFC and hyperuricemia in different subgroups of prediabetic populations. Hb, hemoglobin; TP, total protein; TB, total bilirubin; AST, aspartate aminotransferase; ALT, alanine aminotransferase; GGT, glutamyl transpeptidase; ALP, alkaline phosphatase.
